# Supplementary material
Source: PubMed Central journal article supplement (PMC5453710)

Interlimb coordination is not affected by surgical decompression

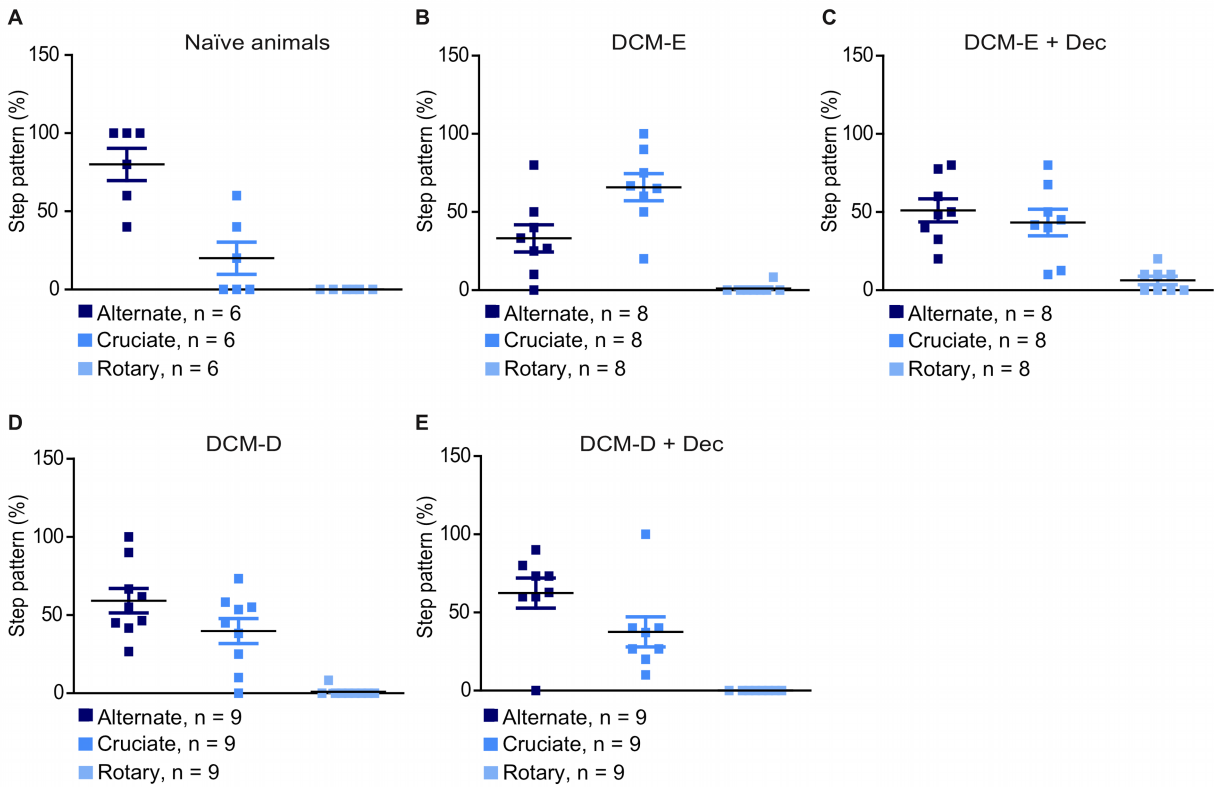

Supplemental figure 1

Supplement: jciinsight-2-92512-s001.pdf [file jciinsight-2-92512-s001.pdf]
